# Supplementary material
Source: HighWire-hosted journal article supplement (https://www.jpn.ca/highwire/filestream/90323/field_highwire_adjunct_files/0/210186-at-1.pdf)
Supplement: 210186-at-1.pdf [file 210186-at-1.pdf]

**Appendix 1** to Kahl CK, Swansburg R, Hai T, et al. Differences in neurometabolites and transcranial magnetic stimulation motor maps in children with attention-deficit/hyperactivity disorder. *J Psychiatry Neurosci* 2022. doi: 10.1503/jpn.210186. Copyright © 2022 The Author(s) or their employer(s).

To receive this resource in an accessible format, please contact us at [cmajgroup@cmaj.ca](mailto:cmajgroup@cmaj.ca).

Online appendices are unedited and posted as supplied by the authors.

**Supplementary Table 1:** Additional neurometabolite concentrations. *Cho:* Choline; *Cr:* Creatine; *DM1:* Dominant Motor Area; *GPC:* Glycerophosphocholine; *Ins:* Inositol; *NAA:* N-acetyl aspartate; *PCr:* Phosphocreatine; *SMA:* Supplementary Motor Area

| Metabolites                     | ADHD<br>Concentration (Mean ± SD) | TDC<br>Concentration (Mean ± SD) |
|---------------------------------|-----------------------------------|----------------------------------|
| <b>N-acetyl aspartate (NAA)</b> |                                   |                                  |
| SMA                             | 9.36 ± 0.76                       | 9.44 ± 0.69                      |
| DM1                             | 9.47 ± 0.822                      | 9.74 ± 0.72                      |
| <b>Creatine</b>                 |                                   |                                  |
| SMA                             | 1.96 ± 0.71                       | 1.65 ± 0.80                      |
| DM1                             | 2.34 ± 1.34                       | 2.54 ± 1.30                      |
| <b>Choline (Cho + GPC)</b>      |                                   |                                  |
| SMA                             | 1.68 ± 0.17                       | 1.58 ± 0.14                      |
| DM1                             | 1.55 ± 0.15                       | 1.50 ± 0.20                      |
| <b>Inositol (Ins)</b>           |                                   |                                  |
| SMA                             | 5.46 ± 0.61                       | 5.33 ± 0.59                      |
| DM1                             | 4.68 ± 0.58                       | 4.31 ± 0.55                      |
| <b>Glutathione (GSH)</b>        |                                   |                                  |
| SMA                             | 1.57 ± 0.37                       | 1.53 ± 0.29                      |
| DM1                             | 1.40 ± 0.55                       | 1.49 ± 0.59                      |
| <b>Lactate (Lac)</b>            |                                   |                                  |
| SMA                             | 0.74 ± 0.82                       | 0.60 ± 0.36                      |
| DM1                             | 0.53 ± 0.46                       | 0.53 ± 0.57                      |
